# Supplementary material for: Salivary gland cancer: ESMO–European Reference Network on Rare Adult Solid Cancers (EURACAN) Clinical Practice Guideline for diagnosis, treatment and follow-up
Source: PubMed Central journal article supplement — ESMO Open. 2022 Nov 2;7(6):100602. doi: 10.1016/j.esmoop.2022.100602 (PMC9808465; doi:10.1016/j.esmoop.2022.100602), 2022-11-02
Supplement: mmc1.pdf [file mmc1.pdf]

# **Salivary gland cancer: ESMO-EURACAN Clinical Practice Guideline for diagnosis, treatment and follow-up**

## **SUPPLEMENTARY MATERIAL**

### **SUPPLEMENTARY TEXT**

#### **SECTION 1. DIAGNOSTIC IMAGING**

The algorithm for evaluating a suspected major salivary gland mass varies according to the specific clinical setting. In all clinical settings, where the mass is superficial, ultrasound should be used as the first imaging step. Ultrasound is effective in assessing the actual glandular origin,<sup>1</sup> but its use is limited when dealing with a solid lesion; neither the signal pattern nor the shape is adequate for differentiating benign from malignant neoplasms. The pooled sensitivity of ultrasound in this setting is 66%, with a specificity of 92%.<sup>2</sup>

When a mass cannot be completely delineated by ultrasound, and in all clinical settings suggesting a malignancy, magnetic resonance imaging (MRI) is the preferred imaging modality. The sensitivity and specificity of computed tomography (CT) and [<sup>18</sup>F]2-fluoro-2-deoxy-D-glucose–positron emission tomography–CT (FDG–PET–CT) for predicting malignant tumours are lower than MRI<sup>3,4</sup> and MRI has greater tissue discrimination. It is important for MRI to combine different pulse sequences: standard T2 and T1 weighting with diffusion weighting with apparent diffusion coefficient map and dynamic analysis post paramagnetic contrast agent administration are recommended. This ‘multiparametric approach’ has a pooled sensitivity of 80% and specificity of 90%.<sup>2</sup> The use of contrast-enhanced CT (CE-CT) is mostly limited to patients in whom MRI is contraindicated (e.g. those with a cardiac pacemaker, claustrophobia, ferrometallic prostheses or foreign bodies) or in addition to MRI when there is a suspicion of bone invasion.

Multiparametric MRI is indicated to demonstrate glandular or extraglandular spread.<sup>5</sup> While the invasion of cortical bony structures can be more easily identified by CE-CT, the permeative invasion of an adenoid cystic carcinoma (AdCC) into spongiotic/diploic bones (skull base, mandible) may be missed by CT, particularly when it presents as replacement of medullary fat bone marrow in the absence of

gross cortical erosions. Such findings are better detected with a non-contrast T1 weighted MRI sequence.<sup>6</sup> Post-contrast high-resolution MRI is the modality of choice to detect perineural spread. According to the site of origin of the neoplasm, the facial nerve (parotid gland) and the maxillary and mandibular branches of the trigeminal nerve (minor salivary glands of the palate, submandibular and sublingual glands) should be scrutinised by MRI. The cavernous sinus, Meckel's caves and geniculate ganglion, which are 'intra-cranial terminal stations', should be included in the field of view of the MRI study. The sensitivity of MRI for perineural spread has been reported to be greater than CT (92.6% versus 87.9%, respectively)<sup>7</sup>; however, incomplete mapping of all involved nerves lowers MRI sensitivity to 20%-37%.

Regardless of the imaging technique used (MRI or CT), the study should be extended to include the ipsilateral and contralateral neck levels or integrated with ultrasound examination of neck lymph nodes. Several recent reports underline that FDG–PET–CT is not inferior to CT and MRI, and in some studies has been shown to be more sensitive in detecting nodal involvement in salivary gland cancer (SGC).<sup>3,8,9</sup>

Distant metastases at presentation are infrequent. In staging SGC, chest CT is recommended in cT3-4 N0 and all stages of AdCC. FDG–PET–CT is recommended for treatment planning in lymph node-positive or high-grade SGC.<sup>3</sup> The following SGCs may be considered high grade: SGCs graded as high according to criteria [e.g. high-grade mucoepidermoid carcinoma (MEC), high-grade acinic cell carcinoma (AcCC)]; all high-grade transformed tumour types [e.g. AdCC, AcCC, secretory carcinoma, epithelial-myoepithelial carcinoma, myoepithelial carcinoma, MEC, polymorphous adenocarcinoma (PAC), clear cell carcinoma<sup>10</sup>]; all AdCC, basal cell adenocarcinoma, adenocarcinoma not otherwise specified (NOS), salivary duct carcinoma, myoepithelial carcinoma, epithelial-myoepithelial carcinoma, carcinoma ex pleomorphic adenoma (CxPA) including subtypes such as salivary duct ex pleomorphic adenoma and myoepithelial ex pleomorphic adenoma), sebaceous adenocarcinoma, carcinosarcoma, poorly differentiated carcinoma (including undifferentiated, small and large cell neuroendocrine carcinoma) and lymphoepithelial carcinoma.

Bone is the second most common site for distant metastases in SGC, after lung.<sup>11</sup> Although the sensitivity of FDG–PET is comparable to that of morphologic imaging techniques, its specificity has been reported to be significantly higher.<sup>12</sup>

## SECTION 2. HISTOLOGICAL SUBTYPES

### **MEC**

MEC is the most common SGC<sup>13</sup> and consists of three cell types: (i) mucinous cells, which are often large and goblet-like and frequently line cystic spaces; (ii) epidermoid cells that are nonkeratinising and may even look frankly squamous; (iii) intermediate cells which are more basal or cuboidal. In addition to clinical stage, tumour grade is a prognostic factor that may guide treatment decisions. MEC is classified into three histological grades (low, intermediate and high) based on evaluation of necrosis, mitoses, atypical nuclei and relative size of the cystic component.<sup>14</sup> Translocations  $t(11;19)$  and  $t(11;15)$ , leading to the *CRTC1-MAML2* and *CRTC3-MAML2* fusions, respectively, are present in 40%-80% and 5% of MECs, respectively.<sup>15</sup> Some studies indicate that fusion-positive MECs are diagnosed at an earlier stage with a lower grade and a better prognosis than fusion-negative tumours,<sup>16</sup> while others have not demonstrated a prognostic role for the translocation.<sup>17</sup> *MAML2* rearrangements have been detected in up to 75% of low-grade and intermediate-grade MECs, but fewer than 50% of high-grade MECs seem to be fusion positive. Among high-grade MECs, fusion-negative tumours behave much more aggressively than fusion-positive tumours. It has been proposed that *CRTC1-MAML2* fusion-negative high-grade carcinomas with MEC-like morphological features and scanty mucin content actually represent a heterogenous group of other high-grade carcinomas, in line with their more aggressive behaviour.<sup>16</sup> Compared with other histological subtypes, MEC presenting as local/locoregional disease has a good prognosis, with a 5-year survival rate of 75.2% [95% confidence interval (CI) 73.8% to 76.7%]. For high-grade disease (26%), the 5-year survival rate drops to 48.5% (95% CI 45.4% to 51.9%).<sup>18</sup>

### **AdCC**

AdCC is a relentlessly growing tumour, composed of epithelial and myoepithelial cells that form various growth patterns (tubular, cribriform and solid), and is associated with *MYB-NFIB* and *MYBL1-NFIB* fusions. Despite bland histopathological features, AdCC is aggressive and characterised in most cases by

perineural and intraneural invasion and distant spread that may develop over years and decades. Mutations in the *NOTCH* gene family are present in around 14% of patients with AdCC at presentation (especially in patients with solid histology), are increasingly present in recurrent or metastatic disease (40%) and are associated with poor outcome.<sup>19,20</sup> Relapsed and disseminated tumours are generally incurable, and overall prognosis is poor, with 15- or 20-year survival rates of 23%-40%.<sup>21</sup>

## **AcCC**

AcCC exhibits serous acinar and lacks mucinous differentiation. It is characterised by solid, microcystic, follicular, less commonly papillary-cystic architectures, often with a prominent lymphoid stroma. Neoplastic cells are heterogeneous with the most common cell type being the serous acinar cell which features periodic acid-Schiff (PAS)-positive, diastase-resistant basophilic cytoplasmic zymogen granules, with variable intercalated duct-type, nonspecific glandular, vacuolated and rarely clear cells. High-grade tumours exhibit, in addition to conventional areas, a component of high-grade adenocarcinoma (with variable cribriform, solid, trabecular growth patterns) or poorly-differentiated/undifferentiated carcinoma. The majority of AcCC cases harbour a *t(4;9)(q13;q31)* rearrangement that places the active enhancer regions of the *SCPP* gene cluster upstream of the *NR4A3/NOR-1* gene, resulting in upregulation of NR4A3 via enhancer hijacking.<sup>22</sup> Nuclear staining for NR4A3/NOR-1 or NR4A2/Nurr1 has been identified in 98% and 2% of cases, respectively.<sup>22,23</sup> The prognosis of patients presenting with local/locoregional AcCC is generally good, with a 20-year disease-specific survival (DSS) rate of 64.3% for patients with stage IV disease.<sup>24</sup> Notably, this value is derived from a large retrospective database study from 1973-2009; however, in 2010 mammary analogue secretory carcinoma, which was formerly frequently classified as AcCC, was defined as a separate entity with excellent prognosis (see below). Therefore, data going back further than 2010 may be biased.<sup>25</sup>

## ***PAC and cribriform adenocarcinoma of salivary gland***

PAC and cribriform adenocarcinoma of salivary gland (CASG) are related entities with partly differing clinicopathological and genomic profiles; they are the subject of

an ongoing taxonomical debate.<sup>26,27</sup> Classical variant PACs, originally called polymorphous (low-grade) adenocarcinomas, are characterised by hotspot point E710D mutations in the *PRKD1* gene,<sup>28</sup> whereas CASGs are characterised by translocations involving the *PRKD1-3* genes.<sup>29</sup> In the 2017 WHO Classification of Head and Neck Tumours, cribriform adenocarcinoma of (minor) salivary gland origin is a subcategory of PAC,<sup>30</sup> but for the purpose of reporting, differentiating between these entities may be helpful given the noticeably different behavioural profiles,<sup>26,27</sup> with CASGs being more frequently extrapalatal, commonly at the base of the tongue, with a propensity for nodal metastasis. The prognosis of patients with PAC is generally good, with 5- and 10-year DSS rates of 98.6% and 96.4%, respectively.<sup>31</sup>

### ***Intraductal carcinoma***

Intraductal carcinoma is a rare, low-grade SGC with histomorphological features reminiscent of atypical ductal hyperplasia or ductal carcinoma *in situ* of the breast. The tumour is, in typical cases, characterised by intraductal and intracystic proliferation of luminal ductal cells exhibiting solid, cribriform and papillary patterns. Notably, recurrent *NCOA4-RET* and *TRIM27-RET* fusion transcripts have been observed in intraductal carcinomas.<sup>32,33</sup> As these genetic aberrations are recurrent, they serve as powerful diagnostic tools in SGC diagnosis, and therefore also in refinement of SGC classification.

### **Salivary duct carcinoma**

Salivary duct carcinoma is a high-grade adenocarcinoma with morphological and molecular features similar to invasive ductal carcinoma of the breast, including androgen receptor expression in 90% of cases and human epidermal growth factor receptor 2 (*HER2*) gene amplification in 30% of cases. Additional common molecular alterations in salivary duct carcinoma include mutations in *TP53*, *PIK3CA* and *HRAS*, and loss or mutation of *PTEN*.<sup>34,35</sup> The majority of salivary duct carcinomas (74%) have alterations in either the mitogen-activated protein kinase (MAPK) pathway (*BRAF*, *HRAS* and *NF1*) or in *HER2/neu*, indicating that MAPK pathway activation and *HER2* amplification are the major oncogenic drivers in salivary duct carcinoma.<sup>36</sup> Gene fusions involving the *PLAG1* and *HMGA2* oncogenes are specific for benign

pleomorphic adenomas and they have also been described in salivary duct carcinoma arising in pleomorphic adenoma.<sup>36</sup> Reported 3-, 5- and 10-year survival rates in patients with salivary duct carcinoma are 70.5% (95% CI 61.4% to 77.8%), 43% (95% CI 33% to 52%) and 26% (95% CI 15% to 37%), respectively.<sup>37</sup>

### ***Adenocarcinoma NOS***

The diagnosis of adenocarcinoma NOS is reducing due to advances in molecular diagnostics. Androgen receptor expression is observed in some cases of adenocarcinoma NOS, and *HER2* gene amplification can also occur. Fifteen-year survival rates for low-, intermediate- and high-grade adenocarcinoma NOS have been reported as 54%, 31% and 3%, respectively.<sup>38</sup>

### **CxPA**

CxPA is subclassified by histological type and extent of invasion. Noninvasive CxPAs (intracapsular) are completely confined within the capsule of the original pleomorphic adenoma, lacking penetration of the capsule. Intracapsular CxPA has a very low reported rate of recurrence and regional metastasis.<sup>39</sup> Minimally invasive CxPAs (<4-6 mm extension beyond the pleomorphic adenoma border) are prognostically favourable.<sup>40</sup> Widely invasive carcinomas extend beyond 6 mm. Prior to diagnosing a noninvasive CxPA, sectioning of the entire lesion for histological evaluation is recommended in order to exclude the presence of invasive growth. Prognosis parallels the degree of invasion, with noninvasive and minimally invasive cancers having a better prognosis than invasive CxPAs,<sup>41</sup> even if intracapsular/minimally invasive CxPAs can also recur and cause death. There is a trend toward worse disease-free survival and DSS in patients with myoepithelial carcinoma.<sup>42</sup>

### ***Secretory carcinoma***

Secretory carcinoma, formerly known as mammary analogue secretory carcinoma,<sup>43</sup> shows morphological, genetic and immunohistochemical similarities to breast secretory carcinoma.<sup>44</sup> One of the main differential diagnoses is AcCC, which

typically contains a basophilic cytoplasm with PAS-positive zymogen granules and a more diverse cytological profile compared with secretory carcinoma. The presence of a chromosomal translocation,  $t(12;15)$ , between the *ETV6* gene on chromosome 12 with *NTRK3* on chromosome 15, generates the fusion product *ETV6-NTRK3*.<sup>43</sup> A small subset of secretory carcinomas show alternative fusions, such as *ETV6-RET*<sup>45</sup>, *ETV6-MET*<sup>46</sup> and *VIM-RET*.<sup>47</sup> Importantly, *ETV6-NTRK3* and *ETV6-RET* fusions may serve as a target for therapy. Secretory carcinoma behaves relatively indolently and has an estimated 5- and 10-year survival rate of 95%. Recurrent or metastatic disease is rare and mainly occurs in high-grade transformation tumours.<sup>48</sup>

### SECTION 3. HISTOLOGICAL DIAGNOSIS

#### *Histological tumour grade*

The histological (microscopic) grading of SGCs has been shown to be an independent prognostic factor and plays a role in optimising therapy, with high-grade tumours requiring intensified treatment strategies (see **Figures 2, 3 and 4**). Further, there is often a positive correlation between histological grade and clinical stage.<sup>41</sup> Nevertheless, most SGC types have an intrinsic biological behaviour and attempted application of a universal grading scheme is not recommended.<sup>41</sup> By assigning a histological type, the tumour grade itself is often implied. As such, a generic grading scheme is no longer recommended for SGCs.<sup>49</sup>

Carcinoma types for which grading systems exist and are relevant are incorporated into histological type. The major diagnostic categories amenable to grading include AdCC, MEC, PAC and adenocarcinoma NOS.<sup>40,41</sup>

High-grade transformation has evolved into an important concept of tumour progression in SGCs. Historically designated as 'dedifferentiation', it describes progression of a typically monomorphic, low-grade carcinoma into a pleomorphic, high-grade carcinoma.<sup>50</sup> The importance of this phenomenon is that tumours demonstrating high-grade transformation show an aggressive clinical course that deviates drastically from the usual behaviour for a given tumour type, thus alerting the treating team to the potential need for more aggressive treatment. Tumours for which this phenomenon is well characterised include AcCC, AdCC, epithelial-myoepithelial carcinoma, secretory carcinoma<sup>51</sup> and many others.<sup>50</sup>

### ***Perineural invasion***

Perineural invasion is diagnostically useful because it establishes a malignant categorisation. The value of perineural invasion as a prognosticator varies depending on tumour type.<sup>52</sup> Involvement of a specifically named nerve (e.g. facial nerve) is incorporated into staging and is assigned a more advanced stage.<sup>49</sup> It is well known that AdCC can extend along nerves beyond the tumour margins; however, studies on perineural invasion in AdCC have provided conflicting results with regard to whether it is a risk factor for local recurrence.<sup>53</sup> A thorough documentation, to include the extent of perineural invasion, histological pattern of perineural and intraneural invasion, localisation and size of involved nerves, should be considered and may be prognostically relevant.<sup>54</sup>

### ***Lymphovascular invasion***

Lymphovascular invasion is nearly always diagnostic for SGC (metastasising pleomorphic adenoma being the obvious exception). Existing data are limited but support its prognostic value, although this varies by tumour type and study.<sup>55</sup>

### ***Extent of invasion***

Macroscopic extraparenchymal extension is the parameter required to upstage a tumour to T3 and is thus more important than microscopic extraparenchymal extension. Bone, skin and facial nerve involvement are parameters that define stage T4a.<sup>49</sup>

### ***Margin status***

Complete surgical excision to include cancer-free margins is the primary treatment for SGCs, because retrospective studies have shown an increased risk for recurrence and decreased survival with close or positive surgical margins.<sup>55,56</sup> Unlike mucosal sites, there are no data to indicate a specified critical margin distance that yields a prognostic difference. Occasionally, SGCs may show encapsulation similar

to that of pleomorphic adenoma. In superficial parotid gland lesions, a tumour that rests on the facial nerve with its capsule may thus be resected conservatively (i.e. dissecting the tumour capsule from the nerve) in order to spare and minimise injury to the facial nerve. Thus, it is not uncommon for such tumour margins to be judged 'close' with the tumour capsule forming the deep margin. It is not clear whether this scenario indicates an increased risk of local recurrence. There are limited data on the use of extracapsular dissection (a tissue sparing technique recently developed for benign tumours) in SGCs that suggest a favourable outcome even with close margins, but this is likely influenced by selection bias, since most carcinomas treated by extracapsular dissection are slow growing and low-grade tumours that were not diagnosed as malignant preoperatively.<sup>55,57</sup>

### ***Frozen section***

Intra-operative frozen sections can be indicated to evaluate margins of resection, perineural invasion and lymph nodes, but only if the result is expected to alter management at the time of surgery.<sup>58</sup> Frozen section analysis has high specificity (99%) and sensitivity (98.5%).<sup>59</sup>

## **SECTION 4. POST-OPERATIVE RADIOTHERAPY**

In a matched pair analysis of patients treated for major SGC, post-operative radiotherapy (RT) improved local control from 17% to 51%.<sup>60</sup> This analysis, however, was based on data collected several decades ago and the treatment groups covered different time periods: surgery alone from 1939-1965; combined treatment from 1966-1982.

In another study of 8580 patients with major SGC, four subgroups were analysed: early stage (T1-2) versus late stage (T3-4) and presence or absence of adverse features (AdCC, intermediate to high grade, positive margins and pN+).<sup>61</sup> After propensity score matched analysis, post-operative RT improved overall survival (OS) in case of adverse features, but not in early stage without adverse features.

Survival was analysed in 2017 patients with minor SGC (70% oral cavity, 15% nasal cavity).<sup>62</sup> The patients were divided into three subgroups with decreasing OS rates,

based on a propensity score matched analysis. Post-operative RT resulted in a 24% survival benefit in patients with advanced T/N category, AdCC, high-grade disease and nasopharynx location. A web-based tool for predicting survival impact of adjuvant RT was developed; however, important data such as surgical margins and perineural and vasoinvasion were lacking.<sup>62</sup>

One of the largest and most detailed retrospective cohort studies is the Dutch Head and Neck Cooperative study, which included 565 patients with SGC, excluding minor SGC of the nasal cavity.<sup>63,64</sup> The reported relative risk for surgery alone, compared with combined treatment, was 9.7 for local recurrence and 2.3 for regional recurrence. The UK National Multidisciplinary Guidelines for the Management of Salivary Gland Tumours are mainly based on this study.<sup>65</sup> Post-operative RT is particularly effective if there are close (<5 mm) or microscopic positive resection margins, enhancing local control from around 50% to 80%-95% in T3-T4 tumours,<sup>66</sup> from 54% to 86% in pathologically confirmed bone invasion and from 60% to 88% in perineural invasion.<sup>64</sup> Grading was not evaluated in this study. Post-operative RT was an independent prognostic factor for patients with pN+ neck involvement, improving regional control from 62% to 86%. For completely resected T1 or T2 tumours with no bone or perineural invasion, surgery alone can result in a >90% 10-year local control rate and adjuvant RT is not indicated.<sup>67</sup>

Several cohort studies in patients with AdCC have reported improved outcomes with the addition of RT to surgery.<sup>68,69</sup> In a cohort of 101 patients with M0 AdCC, post-operative RT improved the 5-year local control rate and disease-free survival compared with surgery alone (81.0% versus 53.4%,  $P = 0.0003$  and 71.3% versus 50.0%,  $P = 0.0052$ , respectively).<sup>70</sup> In a series of 140 patients, besides T4 stage and nerve invasion, omission of RT was an independent negative prognostic factor for local control; however, this was only observed in patients treated with >60 Gy.<sup>68</sup> In case of specifically named perineural invasion (e.g. facial nerve), a radiation field including the extension of the nerve to the base may prevent recurrences.<sup>71</sup>

In a cohort of 87 cases with SGC of the parotid gland ( $n = 70$ ) or submandibular gland ( $n = 17$ ), post-operative RT was an independent prognostic factor for local control, in addition to facial paresis.<sup>70</sup> In another study of patients with parotid gland cancer, 56 patients treated with surgery alone were compared with 91 patients

treated with combined therapy.<sup>72</sup> In multivariate analysis, post-operative RT improved local control, but not OS.

In a study of patients with SGC, 10-year locoregional control was significantly improved in patients who received surgery plus RT versus RT alone for stage I-III and stage IV disease (89% versus 71% and 60% versus 20%, respectively).<sup>73</sup> Although the RT group included a higher number of patients with minor SGC, T4 tumours and AdCC, the significant difference remained in multivariate analysis.

## **SECTION 5. PARTICLE THERAPY**

### ***Photon treatment***

In some small retrospective studies of patients with predominantly T4 disease treated with primary curative photon treatment, 5-year locoregional control rates of up to 50% have been reported; however, after 10 years, these rates may drop to 30%.<sup>64,73,74</sup> A radiation dose of >66 Gy (2 Gy fractions) is advised (preferably 70 Gy).<sup>64,74</sup>

### ***Particle treatment***

Particle therapy regimens vary widely, ranging from normofractionated protons<sup>75,76</sup> to mixed beam<sup>77</sup> and hypofractionated carbon ions (C12).<sup>78,79</sup> Fractionation regimens have never been prospectively compared, hence the choice of fractionation remains at the discretion of the treating institution. Particle RT with biologically effective doses >70 Gy yields promising local control rates, especially in advanced tumours, with mostly mild acute and late toxicity. Depending on the proportion of very advanced cases (T4), reported local control rates are ~60%-70% at 5 years.<sup>78,80</sup>

Experience with C12-only regimens indicates a consistently mild toxicity profile. A pooled analysis of 289 patients with AdCC across four Japanese particle centres reported a local control rate of 88% at 2 years (median follow-up 30 months).<sup>79</sup> Longer-term follow-up of 69 patients with AdCC in China reported a 5-year local control rate of 73%.<sup>78</sup> Subgroup analysis of patients with T4 tumours in the C12 cohorts showed no significant difference in either local control or OS between subtotal resection and definitive RT without prior surgery, suggesting that subtotal

and/or potentially mutilating surgery can be avoided on the condition that high-dose RT can be applied.

In one study, a combination of photons and passive scattered protons up to 75.9 Gy following partial or complete resection in 50% of cases was evaluated in 23 patients.<sup>75</sup> Late toxicity was very high (grade 3 late neurological toxicity in 10 out of 23 patients), potentially due to passive scanning technique. In another study, 35 patients were treated with scanned protons for AdCC; 26 post-operatively (70 Gy in 35 fractions) and 9 as primary therapy (75.6 Gy in 35 fractions).<sup>76</sup> The 2-year local control and progression-free survival rates were 92% and 74%, respectively. Nevertheless, the reported median follow-up of 2.5 years was short and should ideally exceed 5 years, which would also allow for the detection of late toxicity. Similar to the C12 cohorts, resection did not impact OS in high-dose proton therapy, albeit at lower overall case numbers.<sup>76</sup>

### ***Studies comparing photon treatment with particle therapy***

One randomised study compared photon treatment with neutron therapy.<sup>81</sup> The study had to be stopped because of a difference in 2-year locoregional control after inclusion of only 32 patients. The 10-year locoregional control probability was 17% after photon therapy and 56% after neutron therapy; however, survival was equal and late morbidity was higher with neutron therapy.

In a retrospective (not case controlled) study of 75 patients with unresectable or recurrent AdCC, photon treatment was compared with neutrons and demonstrated 5-year local control rates of 32% and 75%, respectively.<sup>82</sup> Survival rates were equal, and grade 3/4 late toxicity was higher for neutrons (4% versus 19%, respectively).

In one prospective study, intensity-modulated RT (IMRT) photon therapy ( $n = 37$ ) was compared with IMRT with a C12 boost ( $n = 58$ ) for unresectable or partially resected AdCC. The choice of treatment was based on the availability of C12. Although the study was not randomised, 5-year locoregional control and OS rates were higher with a C12 boost than without (60% versus 40% and 77% versus 59%, respectively).<sup>77</sup> Acute and late toxicity were comparable.

There are no prospective studies directly comparing photons with protons.

## **SECTION 6. FOLLOW-UP, LONG-TERM IMPLICATIONS AND SURVIVORSHIP**

All decisions around follow-up monitoring and its frequency should be made between the patient and the treating clinical team. Decisions should take into consideration tumour histology, tumour aggressiveness and the wishes of the patient.

In patients with AdCC, frequent and prolonged follow-up is recommended since relapse and distant metastases might occur several years after diagnosis.

Locoregional imaging (preferably head and neck MRI with contrast imaging) is suggested every 3-4 months for the first 2 years, every 6 months from the third to the fifth year and then on an annual basis thereafter. A chest CT at least annually should also be considered.<sup>83</sup>

For patients with other types of SGC with no evidence of disease activity, regular scans 1-2 times per year are suggested for the first 1-2 years, before moving to less frequent scans. Patients with residual/recurrent or metastatic disease should be scanned more regularly (i.e. 2-4 times per year), but when a low growth rate is present, the imaging frequency can be decreased. MRI scans are the best imaging tool for locoregional recurrent disease. There is no consensus on the value of FDG–PET–CT in follow-up, surveillance and assessing local recurrence compared with conventional imaging.<sup>84</sup> Chest CT can be carried out at each imaging timepoint and annually, and a CT of the abdomen is advised annually. In some SGCs, metastatic disease can occur after >5-10 years; therefore, in addition to regular imaging, patients should be informed about the risk of recurrent or metastatic disease and the symptoms to look out for.

Reconstruction of the facial nerve is best done at the moment of the ablative surgery.<sup>58</sup> Prosthetic rehabilitation, such as implant-retained epitheses, prostheses and obturators, with or without soft-tissue and/or bone reconstruction, should be incorporated into the primary surgical plan.<sup>58</sup>

Quality of life is underexamined in patients with SGC, who often experience relationship, social, work and psychological problems. Quality of life is of paramount importance, and open and honest communication with clinicians from the start of treatment allows patients to make informed, subjective decisions. Patient-clinician team trust is key.

Late toxicities and long-term effects of treatment include shoulder pain, telegesis, xerostomia, neck immobility, problems with speech and eating, progressive deafness and jaw stiffness. A good multidisciplinary recovery programme is needed for every patient with SGC.

Clinicians should direct patients to relevant patient organisations so they can access support and information. Studies to better understand SGC are urgently needed. Collaboration between patients and clinicians assists research by ensuring studies are appropriate for patients and by increasing awareness of the studies and therefore patient participation.

**Supplementary Table S1. WHO classification of malignant tumours of the salivary glands<sup>40 a</sup>**

|                                     | <b>ICD-O<br/>code<sup>b</sup></b> |
|-------------------------------------|-----------------------------------|
| <b>Malignant tumours</b>            |                                   |
| Mucoepidermoid carcinoma            | 8430/3                            |
| Adenoid cystic carcinoma            | 8200/3                            |
| Acinic cell carcinoma               | 8550/3                            |
| Polymorphous adenocarcinoma         | 8525/3                            |
| Clear cell carcinoma                | 8310/3                            |
| Basal cell adenocarcinoma           | 8147/3                            |
| Intraductal carcinoma               | 8500/2                            |
| Adenocarcinoma NOS                  | 8140/3                            |
| Salivary duct carcinoma             | 8500/3                            |
| Myoepithelial carcinoma             | 8982/3                            |
| Epithelial-myoepithelial carcinoma  | 8562/3                            |
| Carcinoma ex pleomorphic adenoma    | 8941/3                            |
| Secretory carcinoma                 | 8502/3                            |
| Sebaceous adenocarcinoma            | 8410/3                            |
| Carcinosarcoma                      | 8980/3                            |
| Poorly differentiated carcinoma     |                                   |
| Undifferentiated carcinoma          | 8020/3                            |
| Large cell neuroendocrine carcinoma | 8013/3                            |
| Small cell neuroendocrine carcinoma | 8041/3                            |
| Lymphoepithelial carcinoma          | 8082/3                            |

|                               | ICD-O<br>code <sup>b</sup> |
|-------------------------------|----------------------------|
| Squamous cell carcinoma       | 8070/3                     |
| Oncocytic cell carcinoma      | 8290/3                     |
| Uncertain malignant potential |                            |
| Sialoblastoma                 | 8974/1                     |

ICD-O, International Classification of Diseases for Oncology; NOS, not otherwise specified.

<sup>a</sup> Reproduced from El Naggar et al.<sup>40</sup> with permission.

<sup>b</sup> The morphology codes are from the International Classification of Diseases for Oncology (ICD-O). Behaviour is coded /0 for benign tumours; /1 for unspecified, borderline or uncertain behaviour; /2 for carcinoma *in situ* and grade III intraepithelial neoplasia; and /3 for malignant tumours.

**Supplementary Table S2. The Milan system for reporting salivary gland cytopathology: Implied ROM and recommended clinical management<sup>85 a</sup>**

| <b>Diagnostic category</b>               | <b>ROM (%)<sup>b</sup></b> | <b>Management</b>                                         |
|------------------------------------------|----------------------------|-----------------------------------------------------------|
| I. Non-diagnostic                        | 25                         | Clinical and radiological correlation/repeat FNA cytology |
| II. Non-neoplastic                       | 10                         | Clinical follow-up and radiological correlation           |
| III. Atypia of undetermined significance | 20                         | Repeat FNA cytology or surgery                            |
| IV. Neoplasm                             |                            |                                                           |
| A. Neoplasm: benign                      | <5                         | Surgery or clinical follow-up <sup>c</sup>                |
| B. Neoplasm: SUMP                        | 35                         | Surgery <sup>d</sup>                                      |
| V. Suspicious for malignancy             | 60                         | Surgery <sup>d</sup>                                      |
| VI. Malignant                            | 90                         | Surgery <sup>d,e</sup>                                    |

FNA, fine-needle aspiration; ROM, risk of malignancy; SUMP, salivary gland neoplasm of uncertain malignant potential.

<sup>a</sup> Reproduced from Faquin and Rossi<sup>85</sup> with permission.

<sup>b</sup> The following ranges for risk of malignancy for diagnostic categories have been cited in the literature: non-diagnostic 0%-67%; non-neoplastic 0%-20%; atypia of undetermined significance 10%-35%; neoplasm: benign 0%-13%; SUMP 0%-100%; suspicious for malignancy 0%-100%; and malignant 57%-100%.<sup>86-91</sup>

<sup>c</sup> A subset of patients may be followed clinically.

<sup>d</sup> Intra-operative consultation may be helpful to determine the extent of surgery.

<sup>e</sup> Extent of surgery depends upon type and grade of malignant tumour.

**Supplementary Table S3. Biomarkers and molecular targets for precision medicines and corresponding ESCAT scores**

| <b>Biomarker or genomic alteration</b>                         | <b>Method of detection</b>                                                      | <b>Drug match</b>                                                                | <b>ESCAT score<sup>a,b</sup></b> |
|----------------------------------------------------------------|---------------------------------------------------------------------------------|----------------------------------------------------------------------------------|----------------------------------|
| Androgen receptor in salivary duct carcinoma or adenocarcinoma | IHC                                                                             | Androgen receptor blocker + gonadotropin-releasing hormone agonist <sup>92</sup> | II-B <sup>92</sup>               |
| HER2 in salivary duct carcinoma or adenocarcinoma              | IHC for HER2 protein expression (3+) or FISH for <i>HER2</i> gene amplification | Anti-HER2 antibodies (e.g. trastuzumab) <sup>93</sup>                            | II-B <sup>93</sup>               |
| <i>NTRK</i> fusion in secretory carcinoma                      | NGS or WGS                                                                      | TRK inhibitors (e.g. entrectinib, larotrectinib) <sup>94-96</sup>                | I-C <sup>94-96</sup>             |

ESCAT, ESMO Scale for Clinical Actionability of Molecular Targets; HER2, human epidermal growth factor receptor 2; IHC, immunohistochemistry, NGS, next generation sequencing; NTRK, neurotrophic tyrosine receptor kinase; TRK, tropomyosin receptor kinase; WGS, whole genome sequencing.

<sup>a</sup> ESCAT scores apply to genomic alterations only. These scores have been defined by the guideline authors and validated by the ESMO Translational Research and Precision Medicine Working Group.

<sup>b</sup> II-B, alteration–drug match is associated with antitumour activity with evidence from prospective clinical trials showing that the alteration–drug match in a specific tumour type results in increased responsiveness when treated with a matched drug, however, no data are currently available on survival end points; I-C, alteration–drug match is associated with improved outcome with

evidence from clinical trials across tumour types or basket clinical trials showing clinical benefit associated with the alteration–drug match, with similar benefit observed across tumour types.<sup>97</sup>

**Supplementary Table S4. Key molecular alterations in selected SGCs**

| <b>Tumour type</b>                                            | <b>Chromosomal alteration</b> | <b>Gene fusion/ rearrangement</b>                                                                     | <b>Prevalence (%)</b> |
|---------------------------------------------------------------|-------------------------------|-------------------------------------------------------------------------------------------------------|-----------------------|
| Secretory carcinoma <sup>43,45</sup>                          | <i>t</i> (12;15)(p13;q25)     | <i>ETV6-NTRK3</i>                                                                                     | 95                    |
|                                                               | <i>t</i> (12;10)              | <i>ETV6-RET</i>                                                                                       | 4.5                   |
| Mucoepidermoid carcinoma <sup>15</sup>                        | <i>t</i> (11;19)(q21;p13)     | <i>CRTC1-MAML2</i>                                                                                    | 40-80                 |
|                                                               | <i>t</i> (11;15)(q21;q26)     | <i>CRTC3-MAML2</i>                                                                                    | 5                     |
| Acinic cell carcinoma <sup>22</sup>                           | <i>t</i> (4;9)(q13;q31)       | <i>NR4A3/NOR-1</i>                                                                                    | Majority              |
| Adenoid cystic carcinoma <sup>15</sup>                        | <i>t</i> (6;9)(q22-23;p23-24) | <i>MYB-NFIB</i>                                                                                       | 25-80                 |
|                                                               | <i>t</i> (8;9)                | <i>MYBL1-NFIB</i>                                                                                     | 10-20                 |
| Polymorphous adenocarcinoma, classical variant <sup>28</sup>  | 14q12                         | Hotspot activating <i>PRKD1</i> somatic point mutation (E710D)                                        | 20                    |
| Polymorphous adenocarcinoma, cribriform variant <sup>29</sup> | <i>t</i> (1;14)(p36.11;q12)   | <i>ARID1A-PRKD1</i>                                                                                   | 24                    |
|                                                               | <i>t</i> (X;14)(p11.4;q12)    | <i>DDX3X-PRKD1</i>                                                                                    | 13                    |
|                                                               |                               | <i>PRKD2</i> and <i>PRKD3</i> rearrangements                                                          | 16                    |
| Salivary duct carcinoma <sup>34-36</sup>                      | 17q21.1                       | <i>HER2</i> amplification                                                                             | 30                    |
|                                                               | 3q26.32                       | <i>PIK3CA</i> , <i>NRAS</i> , <i>HRAS</i> , etc mutation                                              | 20                    |
| Myoepithelial carcinoma <sup>98</sup>                         |                               | <i>CHCHD27-PLAG1</i><br><i>PLAG1-CTNNB1</i><br><i>PLAG1-LIFR</i><br>Other <i>PLAG1</i> rearrangements |                       |

|                                                             |                              |                                                                        |       |
|-------------------------------------------------------------|------------------------------|------------------------------------------------------------------------|-------|
| Epithelial-<br>myoepithelial<br>carcinoma <sup>99,100</sup> |                              | <i>HRAS</i> mutation,<br>codon 61                                      | 82.7  |
|                                                             |                              | <i>PIK3CA</i>                                                          | 20.7  |
|                                                             |                              | and/or <i>AKT1</i>                                                     | 6.5   |
| Intraductal<br>carcinoma <sup>32,33</sup>                   | <i>inv(10)(q11.21q11.22)</i> | <i>NCOA4-RET</i><br><i>TRIM27-RET</i>                                  |       |
| Hyalinising clear cell<br>carcinoma <sup>101,102</sup>      | <i>t(12;22)(q13;q12)</i>     | <i>EWSR1-ATF1</i>                                                      | 80-90 |
|                                                             |                              | <i>EWSR1-CREM</i>                                                      | 5     |
| Pleomorphic<br>adenoma <sup>36</sup>                        | <i>t(3;8)(p21;q12)</i>       | <i>PLAG1-CTNNB1</i>                                                    |       |
|                                                             | <i>t(5; 8)(p11;q12)</i>      | <i>PLAG1-LIFR</i>                                                      |       |
|                                                             |                              | Other <i>PLAG1</i><br>rearrangements<br><i>HMGA2</i><br>rearrangements |       |

SGC, salivary gland cancer.

**Supplementary Table S5. Pathological TNM staging of major SGC according to the UICC 8th Edition<sup>103 a</sup>**

| Primary tumour (T) |                                                                                              | Regional lymph nodes (N) |                                                                                                                                                                             | Distant metastasis (M) |                       |
|--------------------|----------------------------------------------------------------------------------------------|--------------------------|-----------------------------------------------------------------------------------------------------------------------------------------------------------------------------|------------------------|-----------------------|
| pTX                | Primary tumour cannot be assessed                                                            | pNX                      | Regional lymph nodes cannot be assessed                                                                                                                                     | pM0                    | No distant metastasis |
| pT0                | No evidence of primary tumour                                                                | pN0                      | No regional lymph node metastasis                                                                                                                                           | pM1                    | Distant metastasis    |
| pT1                | Tumour ≤2 cm in greatest dimension without extraparenchymal extension <sup>b</sup>           | pN1                      | Metastasis in a single ipsilateral lymph node, ≤3 cm in greatest dimension without extranodal extension                                                                     |                        |                       |
| pT2                | Tumour >2 cm but ≤4 cm in greatest dimension without extraparenchymal extension <sup>b</sup> | pN2a                     | Metastasis in a single ipsilateral lymph node, <3 cm in greatest dimension with extranodal extension, or >3 cm but ≤6 cm in greatest dimension without extranodal extension |                        |                       |
| pT3                | Tumour >4 cm and/or tumour with extraparenchymal extension <sup>b</sup>                      | pN2b                     | Metastasis in multiple ipsilateral lymph nodes, none >6 cm in greatest dimension, without extranodal extension                                                              |                        |                       |
| pT4a               | Tumour invades skin, mandible, ear canal and/or facial nerve                                 | pN2c                     | Metastasis in bilateral or contralateral lymph nodes, none >6 cm in                                                                                                         |                        |                       |

|      |                                                                                     |      |                                                                                                                                                                                  |  |  |
|------|-------------------------------------------------------------------------------------|------|----------------------------------------------------------------------------------------------------------------------------------------------------------------------------------|--|--|
|      |                                                                                     |      | greatest dimension, without extranodal extension                                                                                                                                 |  |  |
| pT4b | Tumour invades base of skull, and/or pterygoid plates and/or encases carotid artery | pN3a | Metastasis in a lymph node, >6 cm in greatest dimension without extranodal extension                                                                                             |  |  |
|      |                                                                                     | pN3b | Metastasis in a lymph node, >3 cm in greatest dimension with extranodal extension, or multiple ipsilateral, or any contralateral, or bilateral node(s) with extranodal extension |  |  |

TNM, tumour–node–metastasis; UICC, Union for International Cancer Control; SGC, salivary gland cancer.

<sup>a</sup> Reproduced from Brierley et al.<sup>103</sup> with permission.

<sup>b</sup> Extraparenchymal extension is clinical or macroscopic evidence of invasion of soft tissues or nerve, except those listed under T4a and T4b. Microscopic evidence alone does not constitute extraparenchymal extension for classification purposes.

**Supplementary Table S6. Studies evaluating targeted therapy in different histological subtypes of SGC (angiogenesis inhibitors are excluded)<sup>104 a</sup>**

| Subtype                               | Study type                      | Target     | Drug(s)                                      | N                | Response                  | Prior target identification <sup>b</sup> |
|---------------------------------------|---------------------------------|------------|----------------------------------------------|------------------|---------------------------|------------------------------------------|
| Mucoepidermoid carcinoma              | Case reports <sup>105-109</sup> | EGFR       | Cetuximab, gefitinib, erlotinib <sup>c</sup> | 5 x 1            | PR 40%, CR 40%, PR/PD 20% | Variable                                 |
|                                       | Phase II <sup>110</sup>         | EGFR       | Cetuximab                                    | 2                | n.a. <sup>d</sup>         | No                                       |
|                                       | Phase II <sup>111</sup>         | EGFR       | Gefitinib                                    | 2                | n.a. <sup>d</sup>         | No                                       |
|                                       | Phase II <sup>112</sup>         | EGFR/ERBB2 | Lapatinib                                    | 2                | n.a. <sup>d</sup>         | Yes                                      |
| Adenoid cystic carcinoma <sup>e</sup> | Phase II <sup>113 f</sup>       | c-KIT      | Imatinib                                     | 71<br>(6 trials) | RR 2.8%, SD 48%           | Variable                                 |
|                                       | Phase II <sup>114</sup>         | c-KIT      | Dasatinib                                    | 40               | PR 2.5%, SD 50%           | Yes                                      |
|                                       | Phase II <sup>110 g</sup>       | EGFR       | Cetuximab                                    | 23               | SD 87%                    | No                                       |
|                                       | Phase II <sup>111 g</sup>       | EGFR       | Gefitinib                                    | 18               | PR/CR 0%                  | No                                       |
|                                       | Phase II <sup>112</sup>         | EGFR/ERBB2 | Lapatinib                                    | 21               | SD 79%                    | Yes                                      |

|                                      |                                    |                   |                                    |                 |                               |     |
|--------------------------------------|------------------------------------|-------------------|------------------------------------|-----------------|-------------------------------|-----|
|                                      | Phase I <sup>115 g</sup>           | NOTCH1            | Brontictuzumab                     | 12              | PR 17%, SD 25%                | Yes |
|                                      | Phase I expansion <sup>116 g</sup> | NOTCH1            | Crenigacestat                      | 22              | Unconfirmed PR 5%, SD 68%     | No  |
| Salivary duct carcinoma <sup>h</sup> | Phase II <sup>92 i</sup>           | Androgen receptor | Leuprorelin acetate + bicalutamide | 36              | CR 11.1%, PR 30.6%, SD 44.4%  | Yes |
|                                      | Phase II <sup>93</sup>             | HER2              | Trastuzumab + docetaxel            | 57              | CR 14%, PR 56%, SD 25%, PD 5% | Yes |
|                                      | Phase II <sup>117</sup>            | HER2              | Trastuzumab-<br>emtansine          | 10 <sup>j</sup> | OR 90%                        | Yes |
| Secretory carcinoma                  | Phase II <sup>94</sup>             | TRK               | Larotrectinib                      | 12              | n.a. <sup>d</sup>             | Yes |
|                                      | Case reports <sup>95,96</sup>      | TRK               | Entrectinib<br>Repotrectinib       | 2x1             | PR                            | Yes |
| All SGC                              | Phase II <sup>118</sup>            | HRAS              | Tipifarnib                         | 13              | PR 8%, SD 58%                 | Yes |

ChT, chemotherapy; CR, complete response; EGFR, epidermal growth factor receptor; HER2, human epidermal growth factor receptor 2; n.a., not available; NOS, not otherwise specified; OR, overall response; PD, progressive disease; PR, partial response; RR, response rate; RT, radiotherapy; SD, stable disease; SGC, salivary gland cancer; TRK, tropomyosin receptor kinase.

<sup>a</sup> Reproduced from Lassche et al.<sup>104</sup> with permission from Elsevier.

<sup>b</sup> This column lists whether the targeted agent was only administered to patients with the known genetic aberration, upregulation or protein overexpression at which it was aimed.

<sup>c</sup> Cetuximab was combined with either ChT or RT.

<sup>d</sup> Proportion of responding patients with the specific histological subtype not specified.

<sup>e</sup> Not all studies/case reports are included in this table. See also the review by Alfieri et al.<sup>119</sup>

<sup>f</sup> One trial combined imatinib with cisplatin.

<sup>g</sup> Evidence of disease progression not required.

<sup>h</sup> Not all studies/case reports are included in this table. See also the review by Schmitt et al.<sup>120</sup>

<sup>i</sup> Only 34 of 36 included patients had salivary duct carcinoma; two had adenocarcinoma NOS.

<sup>j</sup> Ten patients with HER2-positive SGC; presumably most patients had salivary duct carcinoma.

**Supplementary Table S7. Studies<sup>a</sup> evaluating angiogenesis inhibitors in SGC, with a focus on adenoid cystic carcinoma**

| <b>Drug</b>               | <b>Subtype</b>           | <b>Study type</b>   | <b>N</b>                                             | <b>Response rate (%)</b> | <b>Median PFS (months)</b> | <b>Median OS (months)</b>  |
|---------------------------|--------------------------|---------------------|------------------------------------------------------|--------------------------|----------------------------|----------------------------|
| Axitinib <sup>121</sup>   | Adenoid cystic carcinoma | Phase II            | 33                                                   | 9.1                      | 5.7                        | n.a.                       |
| Axitinib <sup>122</sup>   | Adenoid cystic carcinoma | Phase II            | 26                                                   | 8                        | 5.5                        | 26.2                       |
| Axitinib <sup>123</sup>   | Adenoid cystic carcinoma | Randomised phase II | 60 [30 started axitinib (A); 30 observation arm (O)] | A: 0%; O: 0%             | A: 10.8;<br>O: 2.8         | A: not reached;<br>O: 27.2 |
| Lenvatinib <sup>124</sup> | Adenoid cystic carcinoma | Phase II            | 32                                                   | 15.6                     | 17.5                       | n.a.                       |
| Lenvatinib <sup>125</sup> | Adenoid cystic carcinoma | Phase II            | 28                                                   | 11.5                     | 9.1                        | 27                         |
| Sorafenib <sup>126</sup>  | Adenoid cystic carcinoma | Phase II            | 23                                                   | 11                       | 11.3                       | 19.6                       |
| Sorafenib <sup>127</sup>  | All                      | Phase II            | 37 (19 adenoid cystic carcinoma)                     | 16                       | 5.9                        | 23.5                       |
| Sunitinib <sup>128</sup>  | Adenoid cystic carcinoma | Phase II            | 14                                                   | 0                        | 7.2                        | 18.7                       |

n.a., not available; OS, overall survival; PFS, progression-free survival; SGC, salivary gland cancer.

<sup>a</sup> Only studies that have been published in a peer-reviewed publication are included.

**Supplementary Table S8. ESMO-MCBS table for new therapies/indications in SGC**

| Therapy                    | Disease setting                                                                                                                                                                                                                                                                                           | Trial                                                                                                                                         | Control    | Absolute survival gain                                                       | HR (95% CI) | QoL/toxicity | ESMO-MCBS score <sup>a</sup> |
|----------------------------|-----------------------------------------------------------------------------------------------------------------------------------------------------------------------------------------------------------------------------------------------------------------------------------------------------------|-----------------------------------------------------------------------------------------------------------------------------------------------|------------|------------------------------------------------------------------------------|-------------|--------------|------------------------------|
| <b>Secretory carcinoma</b> |                                                                                                                                                                                                                                                                                                           |                                                                                                                                               |            |                                                                              |             |              |                              |
| Entrectinib                | Adult and paediatric patients 12 years of age and older with solid tumours expressing an <i>NTRK</i> gene fusion, who have disease that is locally advanced, metastatic or where surgical resection is likely to result in severe morbidity, and who have not received a prior <i>NTRK</i> inhibitor, and | STARTRK-1;<br>STARTRK-2;<br>ALKA-372-001 <sup>129</sup><br><br>Phase I/II<br><br>NCT02097810<br><br>NCT02568267<br><br>EudraCT 2012-000148-88 | Single arm | ORR: 57%<br><br>Median DoR:<br>10.4 months<br><br>Median PFS:<br>11.2 months |             |              | 3<br><br>(Form 3)            |

|               |                                                                                                                                                                                                                                                                     |                                                                                                                                                                                                           |            |                                                                        |  |  |                   |
|---------------|---------------------------------------------------------------------------------------------------------------------------------------------------------------------------------------------------------------------------------------------------------------------|-----------------------------------------------------------------------------------------------------------------------------------------------------------------------------------------------------------|------------|------------------------------------------------------------------------|--|--|-------------------|
|               | who have no satisfactory treatment options                                                                                                                                                                                                                          |                                                                                                                                                                                                           |            |                                                                        |  |  |                   |
| Larotrectinib | Adult and paediatric patients with solid tumours that display an <i>NTRK</i> gene fusion, who have disease that is locally advanced, metastatic or where surgical resection is likely to result in severe morbidity, and who have no satisfactory treatment options | Studies of larotrectinib in patients with <i>NTRK</i> fusion-positive tumours (including SCOUT and NAVIGATE) <sup>94,130</sup><br><br>Phase I/II<br><br>NCT02122913<br><br>NCT02637687<br><br>NCT02576431 | Single arm | ORR: 79%<br><br>Median DoR: 35.2 months<br><br>Median PFS: 28.3 months |  |  | 3<br><br>(Form 3) |

CI, confidence interval; DoR, duration of response; ESMO-MCBS, ESMO-Magnitude of Clinical Benefit Scale; HR, hazard ratio; NTRK, neurotrophic tyrosine receptor kinase; ORR, overall response rate; PFS, progression-free survival; QoL, quality of life; SGC, salivary gland cancer.

<sup>a</sup> ESMO-MCBS v1.1<sup>131</sup> was used to calculate scores for new therapies/indications approved by the EMA or FDA. The scores have been calculated by the ESMO-MCBS Working Group and validated by the ESMO Guidelines Committee (<https://www.esmo.org/guidelines/esmo-mcbs/esmo-mcbs-evaluation-forms>).

**Supplementary Table S9. Levels of evidence and grades of recommendation  
(adapted from the Infectious Diseases Society of America-United States Public Health Service Grading System<sup>a</sup>)**

**Levels of evidence**

|     |                                                                                                                                                                                                  |
|-----|--------------------------------------------------------------------------------------------------------------------------------------------------------------------------------------------------|
| I   | Evidence from at least one large randomised, controlled trial of good methodological quality (low potential for bias) or meta-analyses of well-conducted randomised trials without heterogeneity |
| II  | Small randomised trials or large randomised trials with a suspicion of bias (lower methodological quality) or meta-analyses of such trials or of trials demonstrated heterogeneity               |
| III | Prospective cohort studies                                                                                                                                                                       |
| IV  | Retrospective cohort studies or case-control studies                                                                                                                                             |
| V   | Studies without control group, case reports, expert opinions                                                                                                                                     |

**Grades of recommendation**

|   |                                                                                                                                       |
|---|---------------------------------------------------------------------------------------------------------------------------------------|
| A | Strong evidence for efficacy with a substantial clinical benefit, strongly recommended                                                |
| B | Strong or moderate evidence for efficacy but with a limited clinical benefit, generally recommended                                   |
| C | Insufficient evidence for efficacy or benefit does not outweigh the risk or the disadvantages (adverse events, costs, etc.), optional |
| D | Moderate evidence against efficacy or for adverse outcome, generally not recommended                                                  |
| E | Strong evidence against efficacy or for adverse outcome, never recommended                                                            |

<sup>a</sup> Reprinted by permission of Oxford University Press on behalf of the Infectious Diseases Society of America.<sup>132,133</sup>

## REFERENCES

1. Lamont JP, McCarty TM, Fisher TL, et al. Prospective evaluation of office-based parotid ultrasound. *Ann Surg Oncol*. 2001;8(9):720-722.
2. Kong X, Li H, Han Z. The diagnostic role of ultrasonography, computed tomography, magnetic resonance imaging, positron emission tomography/computed tomography, and real-time elastography in the differentiation of benign and malignant salivary gland tumors: a meta-analysis. *Oral Surg Oral Med Oral Pathol Oral Radiol*. 2019;128(4):431-443.
3. Bertagna F, Nicolai P, Maroldi R, et al. Diagnostic role of (18)F-FDG-PET or PET/CT in salivary gland tumors: A systematic review. *Rev Esp Med Nucl Imagen Mol*. 2015;34(5):295-302.
4. Kendi AT, Magliocca KR, Corey A, et al. Is There a Role for PET/CT Parameters to Characterize Benign, Malignant, and Metastatic Parotid Tumors? *AJR Am J Roentgenol*. 2016;207(3):635-640.
5. Abdel Razek AAK, Mukherji SK. State-of-the-Art Imaging of Salivary Gland Tumors. *Neuroimaging Clin N Am*. 2018;28(2):303-317.
6. Freling N, Crippa F, Maroldi R. Staging and follow-up of high-grade malignant salivary gland tumours: The role of traditional versus functional imaging approaches - A review. *Oral Oncol*. 2016;60:157-166.
7. Hanna E, Vural E, Prokopakis E, et al. The sensitivity and specificity of high-resolution imaging in evaluating perineural spread of adenoid cystic carcinoma to the skull base. *Arch Otolaryngol Head Neck Surg*. 2007;133(6):541-545.
8. Kim MJ, Kim JS, Roh JL, et al. Utility of 18F-FDG PET/CT for detecting neck metastasis in patients with salivary gland carcinomas: preoperative planning for necessity and extent of neck dissection. *Ann Surg Oncol*. 2013;20(3):899-905.
9. Westergaard-Nielsen M, Rohde M, Godballe C, et al. Up-front F18-FDG PET/CT in suspected salivary gland carcinoma. *Ann Nucl Med*. 2019;33(8):554-563.
10. Skalova A, Leivo I, Hellquist H, et al. High-grade Transformation/Dedifferentiation in Salivary Gland Carcinomas: Occurrence

- Across Subtypes and Clinical Significance. *Adv Anat Pathol*. 2021;28(3):107-118.
11. Ali S, Bryant R, Palmer FL, et al. Distant Metastases in Patients with Carcinoma of the Major Salivary Glands. *Ann Surg Oncol*. 2015;22(12):4014-4019.
  12. Sharma P, Jain TK, Singh H, et al. Utility of (18)F-FDG PET-CT in staging and restaging of patients with malignant salivary gland tumours: a single-institutional experience. *Nucl Med Commun*. 2013;34(3):211-219.
  13. Brandwein-Gensler M, Bell D, Inagaki H, et al. Mucoepidermoid carcinoma. In: El Nagggar A, Chan JKC, Grandis JR, Takata T, Slootweg PJ, eds. *World Health Organization (WHO) Classification of Head and Neck Tumours*. 4th ed. Lyon, France: IARC Press; 2017:163-164.
  14. Chen MM, Roman SA, Sosa JA, et al. Histologic grade as prognostic indicator for mucoepidermoid carcinoma: a population-level analysis of 2400 patients. *Head Neck*. 2014;36(2):158-163.
  15. Skalova A, Stenman G, Simpson RHW, et al. The Role of Molecular Testing in the Differential Diagnosis of Salivary Gland Carcinomas. *Am J Surg Pathol*. 2018;42(2):e11-e27.
  16. Jee KJ, Persson M, Heikinheimo K, et al. Genomic profiles and CRTC1-MAML2 fusion distinguish different subtypes of mucoepidermoid carcinoma. *Mod Pathol*. 2013;26(2):213-222.
  17. Birkeland AC, Foltin SK, Michmerhuizen NL, et al. Correlation of Crtc1/3-Maml2 fusion status, grade and survival in mucoepidermoid carcinoma. *Oral Oncol*. 2017;68:5-8.
  18. Rajasekaran K, Stubbs V, Chen J, et al. Mucoepidermoid carcinoma of the parotid gland: A National Cancer Database study. *Am J Otolaryngol*. 2018;39(3):321-326.
  19. Ferrarotto R, Mitani Y, Diao L, et al. Activating NOTCH1 Mutations Define a Distinct Subgroup of Patients With Adenoid Cystic Carcinoma Who Have Poor Prognosis, Propensity to Bone and Liver Metastasis, and Potential Responsiveness to Notch1 Inhibitors. *J Clin Oncol*. 2017;35(3):352-360.
  20. Ho AS, Ochoa A, Jayakumaran G, et al. Genetic hallmarks of recurrent/metastatic adenoid cystic carcinoma. *J Clin Invest*. 2019;129(10):4276-4289.

21. Xu B, Drill E, Ho A, et al. Predictors of Outcome in Adenoid Cystic Carcinoma of Salivary Glands: A Clinicopathologic Study With Correlation Between MYB Fusion and Protein Expression. *Am J Surg Pathol*. 2017;41(10):1422-1432.
22. Haller F, Bieg M, Will R, et al. Enhancer hijacking activates oncogenic transcription factor NR4A3 in acinic cell carcinomas of the salivary glands. *Nat Commun*. 2019;10(1):368.
23. Haller F, Skalova A, Ihrler S, et al. Nuclear NR4A3 Immunostaining Is a Specific and Sensitive Novel Marker for Acinic Cell Carcinoma of the Salivary Glands. *Am J Surg Pathol*. 2019;43(9):1264-1272.
24. Biron VL, Lentsch EJ, Gerry DR, et al. Factors influencing survival in acinic cell carcinoma: a retrospective survival analysis of 2061 patients. *Head Neck*. 2015;37(6):870-877.
25. Vander Poorten V, Triantafyllou A, Thompson LD, et al. Salivary acinic cell carcinoma: reappraisal and update. *Eur Arch Otorhinolaryngol*. 2016;273(11):3511-3531.
26. Skalova A, Sima R, Kaspirkova-Nemcova J, et al. Cribriform adenocarcinoma of minor salivary gland origin principally affecting the tongue: characterization of new entity. *Am J Surg Pathol*. 2011;35(8):1168-1176.
27. Xu B, Barbieri AL, Bishop JA, et al. Histologic Classification and Molecular Signature of Polymorphous Adenocarcinoma (PAC) and Cribriform Adenocarcinoma of Salivary Gland (CASG): An International Interobserver Study. *Am J Surg Pathol*. 2020;44(4):545-552.
28. Weinreb I, Piscuoglio S, Martelotto LG, et al. Hotspot activating PRKD1 somatic mutations in polymorphous low-grade adenocarcinomas of the salivary glands. *Nat Genet*. 2014;46(11):1166-1169.
29. Weinreb I, Zhang L, Tirunagari LM, et al. Novel PRKD gene rearrangements and variant fusions in cribriform adenocarcinoma of salivary gland origin. *Genes Chromosomes Cancer*. 2014;53(10):845-856.
30. Fonseca I, Assaad A, Katabi N. Polymorphous adenocarcinoma. In: El Naggari AK, Chan JKC, Grandis JR, Takata T, Slootweg PJ, eds. *World Health Organization (WHO) Classification of Head and Neck Tumours*. 4th ed. Lyon, France: IARC Press; 2017:167-168.

31. Vander Poorten V, Triantafyllou A, Skalova A, et al. Polymorphous adenocarcinoma of the salivary glands: reappraisal and update. *Eur Arch Otorhinolaryngol*. 2018;275(7):1681-1695.
32. Skalova A, Ptakova N, Santana T, et al. NCOA4-RET and TRIM27-RET Are Characteristic Gene Fusions in Salivary Intraductal Carcinoma, Including Invasive and Metastatic Tumors: Is "Intraductal" Correct? *Am J Surg Pathol*. 2019;43(10):1303-1313.
33. Skalova A, Vanecek T, Uro-Coste E, et al. Molecular Profiling of Salivary Gland Intraductal Carcinoma Revealed a Subset of Tumors Harboring NCOA4-RET and Novel TRIM27-RET Fusions: A Report of 17 cases. *Am J Surg Pathol*. 2018;42(11):1445-1455.
34. Seethala RR, Griffith CC. Molecular Pathology: Predictive, Prognostic, and Diagnostic Markers in Salivary Gland Tumors. *Surg Pathol Clin*. 2016;9(3):339-352.
35. Nakaguro M, Tada Y, Faquin WC, et al. Salivary duct carcinoma: Updates in histology, cytology, molecular biology, and treatment. *Cancer Cytopathol*. 2020;128(10):693-703.
36. Dalin MG, Desrichard A, Katabi N, et al. Comprehensive Molecular Characterization of Salivary Duct Carcinoma Reveals Actionable Targets and Similarity to Apocrine Breast Cancer. *Clin Cancer Res*. 2016;22(18):4623-4633.
37. Uijen MJM, Lassche G, van Engen-van Grunsven ACH, et al. Systemic therapy in the management of recurrent or metastatic salivary duct carcinoma: A systematic review. *Cancer Treat Rev*. 2020;89:102069.
38. Spiro RH, Huvos AG, Strong EW. Adenocarcinoma of salivary origin. Clinicopathologic study of 204 patients. *Am J Surg*. 1982;144(4):423-431.
39. Di Palma S. Carcinoma ex pleomorphic adenoma, with particular emphasis on early lesions. *Head Neck Pathol*. 2013;7 Suppl 1:S68-76.
40. El Naggar AK, Chan JK, Grandis JR, et al. *World Health Organization (WHO) Classification of Head and Neck Tumours*. 4th ed. Lyon, France: IARC Press; 2017.
41. Seethala RR. Histologic grading and prognostic biomarkers in salivary gland carcinomas. *Adv Anat Pathol*. 2011;18(1):29-45.

42. Katabi N, Gomez D, Klimstra DS, et al. Prognostic factors of recurrence in salivary carcinoma ex pleomorphic adenoma, with emphasis on the carcinoma histologic subtype: a clinicopathologic study of 43 cases. *Hum Pathol.* 2010;41(7):927-934.
43. Skalova A, Vanecek T, Sima R, et al. Mammary analogue secretory carcinoma of salivary glands, containing the ETV6-NTRK3 fusion gene: a hitherto undescribed salivary gland tumor entity. *Am J Surg Pathol.* 2010;34(5):599-608.
44. Tognon C, Knezevich SR, Huntsman D, et al. Expression of the ETV6-NTRK3 gene fusion as a primary event in human secretory breast carcinoma. *Cancer Cell.* 2002;2(5):367-376.
45. Skalova A, Vanecek T, Martinek P, et al. Molecular Profiling of Mammary Analog Secretory Carcinoma Revealed a Subset of Tumors Harboring a Novel ETV6-RET Translocation: Report of 10 Cases. *Am J Surg Pathol.* 2018;42(2):234-246.
46. Rooper LM, Karantanos T, Ning Y, et al. Salivary Secretory Carcinoma With a Novel ETV6-MET Fusion: Expanding the Molecular Spectrum of a Recently Described Entity. *Am J Surg Pathol.* 2018;42(8):1121-1126.
47. Skalova A, Baneckova M, Thompson LDR, et al. Expanding the Molecular Spectrum of Secretory Carcinoma of Salivary Glands With a Novel VIM-RET Fusion. *American Journal of Surgical Pathology.* 2020;44(10):1295-1307.
48. Boon E, Valstar MH, van der Graaf WTA, et al. Clinicopathological characteristics and outcome of 31 patients with ETV6-NTRK3 fusion gene confirmed (mammary analogue) secretory carcinoma of salivary glands. *Oral Oncol.* 2018;82:29-33.
49. Lydiatt WM, Mukherji SK, O'Sullivan B, et al. Major salivary glands. In: Amin MB, Edge SB, Greene FL, et al., eds. *AJCC Cancer Staging Manual.* 8th ed. Chicago, IL: Springer; 2017:95-101.
50. Nagao T. "Dedifferentiation" and high-grade transformation in salivary gland carcinomas. *Head Neck Pathol.* 2013;7 Suppl 1:S37-47.
51. Skalova A, Vanecek T, Majewska H, et al. Mammary analogue secretory carcinoma of salivary glands with high-grade transformation: report of 3 cases with the ETV6-NTRK3 gene fusion and analysis of TP53, beta-catenin, EGFR, and CCND1 genes. *Am J Surg Pathol.* 2014;38(1):23-33.

52. Speight PM, Barrett AW. Prognostic factors in malignant tumours of the salivary glands. *Br J Oral Maxillofac Surg*. 2009;47(8):587-593.
53. Barrett AW, Speight PM. Perineural invasion in adenoid cystic carcinoma of the salivary glands: a valid prognostic indicator? *Oral Oncol*. 2009;45(11):936-940.
54. Teymoortash A, Zieger L, Hoch S, et al. Distinct microscopic features of perineural invasion in adenoid cystic carcinoma of the head and neck. *Histopathology*. 2014;64(7):1037-1039.
55. Seethala RR, Altemani A, Ferris RL, et al. Data Set for the Reporting of Carcinomas of the Major Salivary Glands: Explanations and Recommendations of the Guidelines From the International Collaboration on Cancer Reporting. *Arch Pathol Lab Med*. 2019;143(5):578-586.
56. Zenga J, Parikh AS, Emerick KS, et al. Close Margins and Adjuvant Radiotherapy in Acinic Cell Carcinoma of the Parotid Gland. *JAMA Otolaryngol Head Neck Surg*. 2018;144(11):1011-1016.
57. Psychogios G, Bohr C, Constantinidis J, et al. Review of surgical techniques and guide for decision making in the treatment of benign parotid tumors. *Eur Arch Otorhinolaryngol*. 2021;278(1):15-29.
58. Lombardi D, McGurk M, Vander Poorten V, et al. Surgical treatment of salivary malignant tumors. *Oral Oncol*. 2017;65:102-113.
59. Olsen KD, Moore EJ, Lewis JE. Frozen section pathology for decision making in parotid surgery. *JAMA Otolaryngol Head Neck Surg*. 2013;139(12):1275-1278.
60. Armstrong JG, Harrison LB, Spiro RH, et al. Malignant tumors of major salivary gland origin. A matched-pair analysis of the role of combined surgery and postoperative radiotherapy. *Arch Otolaryngol Head Neck Surg*. 1990;116(3):290-293.
61. Cheraghlou S, Kuo P, Mehra S, et al. Adjuvant therapy in major salivary gland cancers: Analysis of 8580 patients in the National Cancer Database. *Head Neck*. 2018;40(7):1343-1355.
62. Zeidan YH, Pekelis L, An Y, et al. Survival benefit for adjuvant radiation therapy in minor salivary gland cancers. *Oral Oncol*. 2015;51(5):438-445.
63. Terhaard CH, Lubsen H, Van der Tweel I, et al. Salivary gland carcinoma: independent prognostic factors for locoregional control, distant metastases,

- and overall survival: results of the Dutch head and neck oncology cooperative group. *Head Neck*. 2004;26(8):681-692.
64. Terhaard CH, Lubsen H, Rasch CR, et al. The role of radiotherapy in the treatment of malignant salivary gland tumors. *Int J Radiat Oncol Biol Phys*. 2005;61(1):103-111.
  65. Sood S, McGurk M, Vaz F. Management of Salivary Gland Tumours: United Kingdom National Multidisciplinary Guidelines. *J Laryngol Otol*. 2016;130(S2):S142-S149.
  66. Franzese C, Ingargiola R, Tomatis S, et al. Metastatic salivary gland carcinoma: A role for stereotactic body radiation therapy? A study of AIRO-Head and Neck working group. *Oral Dis*. 2022;28(2):345-351.
  67. Salivary glands. In: Halperin EC, Wazer DE, Perez CA, Brady LW, eds. *Perez & Brady's Principles and Practice of Radiation Oncology* 7th ed. Philadelphia, PA, USA: Wolters Kluwer Health; 2018.
  68. Chen AM, Bucci MK, Weinberg V, et al. Adenoid cystic carcinoma of the head and neck treated by surgery with or without postoperative radiation therapy: prognostic features of recurrence. *Int J Radiat Oncol Biol Phys*. 2006;66(1):152-159.
  69. Shen C, Xu T, Huang C, et al. Treatment outcomes and prognostic features in adenoid cystic carcinoma originated from the head and neck. *Oral Oncol*. 2012;48(5):445-449.
  70. North CA, Lee DJ, Piantadosi S, et al. Carcinoma of the major salivary glands treated by surgery or surgery plus postoperative radiotherapy. *Int J Radiat Oncol Biol Phys*. 1990;18(6):1319-1326.
  71. Chen AM, Garcia J, Granchi P, et al. Base of skull recurrences after treatment of salivary gland cancer with perineural invasion reduced by postoperative radiotherapy. *Clin Otolaryngol*. 2009;34(6):539-545.
  72. Pohar S, Gay H, Rosenbaum P, et al. Malignant parotid tumors: presentation, clinical/pathologic prognostic factors, and treatment outcomes. *Int J Radiat Oncol Biol Phys*. 2005;61(1):112-118.
  73. Holtzman A, Morris CG, Amdur RJ, et al. Outcomes after primary or adjuvant radiotherapy for salivary gland carcinoma. *Acta Oncol*. 2017;56(3):484-489.

74. Chen AM, Bucci MK, Quivey JM, et al. Long-term outcome of patients treated by radiation therapy alone for salivary gland carcinomas. *Int J Radiat Oncol Biol Phys*. 2006;66(4):1044-1050.
75. Pommier P, Liebsch NJ, Deschler DG, et al. Proton beam radiation therapy for skull base adenoid cystic carcinoma. *Arch Otolaryngol Head Neck Surg*. 2006;132(11):1242-1249.
76. Pelak MJ, Walser M, Bachtary B, et al. Clinical outcomes of head and neck adenoid cystic carcinoma patients treated with pencil beam-scanning proton therapy. *Oral Oncol*. 2020;107:104752.
77. Jensen AD, Nikoghosyan AV, Poulakis M, et al. Combined intensity-modulated radiotherapy plus raster-scanned carbon ion boost for advanced adenoid cystic carcinoma of the head and neck results in superior locoregional control and overall survival. *Cancer*. 2015;121(17):3001-3009.
78. Mizoe JE, Hasegawa A, Jingu K, et al. Results of carbon ion radiotherapy for head and neck cancer. *Radiother Oncol*. 2012;103(1):32-37.
79. Sulaiman NS, Demizu Y, Koto M, et al. Multicenter Study of Carbon-Ion Radiation Therapy for Adenoid Cystic Carcinoma of the Head and Neck: Subanalysis of the Japan Carbon-Ion Radiation Oncology Study Group (J-CROS) Study (1402 HN). *Int J Radiat Oncol Biol Phys*. 2018;100(3):639-646.
80. Jensen AD, Poulakis M, Nikoghosyan AV, et al. High-LET radiotherapy for adenoid cystic carcinoma of the head and neck: 15 years' experience with raster-scanned carbon ion therapy. *Radiother Oncol*. 2016;118(2):272-280.
81. Laramore GE, Krall JM, Griffin TW, et al. Neutron versus photon irradiation for unresectable salivary gland tumors: final report of an RTOG-MRC randomized clinical trial. Radiation Therapy Oncology Group. Medical Research Council. *Int J Radiat Oncol Biol Phys*. 1993;27(2):235-240.
82. Huber PE, Debus J, Latz D, et al. Radiotherapy for advanced adenoid cystic carcinoma: neutrons, photons or mixed beam? *Radiother Oncol*. 2001;59(2):161-167.
83. Gatta G, Guzzo M, Locati LD, et al. Major and minor salivary gland tumours. *Crit Rev Oncol Hematol*. 2020;152:102959.
84. Broski SM, Johnson DR, Packard AT, et al. (18)F-fluorodeoxyglucose PET/Computed Tomography: Head and Neck Salivary Gland Tumors. *PET Clin*. 2022;17(2):249-263.

85. Faquin W, Rossi ED, Baloch Z, et al. *The Milan system for reporting salivary gland cytopathology*. New York, NY: Springer; 2018.
86. Colella G, Cannavale R, Flamminio F, et al. Fine-needle aspiration cytology of salivary gland lesions: a systematic review. *J Oral Maxillofac Surg*. 2010;68(9):2146-2153.
87. Griffith CC, Pai RK, Schneider F, et al. Salivary gland tumor fine-needle aspiration cytology: a proposal for a risk stratification classification. *Am J Clin Pathol*. 2015;143(6):839-853.
88. Liu CC, Jethwa AR, Khariwala SS, et al. Sensitivity, Specificity, and Posttest Probability of Parotid Fine-Needle Aspiration: A Systematic Review and Meta-analysis. *Otolaryngol Head Neck Surg*. 2016;154(1):9-23.
89. Rossi ED, Wong LQ, Bizzarro T, et al. The impact of FNAC in the management of salivary gland lesions: Institutional experiences leading to a risk-based classification scheme. *Cancer Cytopathol*. 2016;124(6):388-396.
90. Wei S, Layfield LJ, LiVolsi VA, et al. Reporting of fine needle aspiration (FNA) specimens of salivary gland lesions: A comprehensive review. *Diagn Cytopathol*. 2017;45(9):820-827.
91. Schmidt RL, Hunt JP, Hall BJ, et al. A systematic review and meta-analysis of the diagnostic accuracy of frozen section for parotid gland lesions. *Am J Clin Pathol*. 2011;136(5):729-738.
92. Fushimi C, Tada Y, Takahashi H, et al. A prospective phase II study of combined androgen blockade in patients with androgen receptor-positive metastatic or locally advanced unresectable salivary gland carcinoma. *Ann Oncol*. 2018;29(4):979-984.
93. Takahashi H, Tada Y, Saotome T, et al. Phase II Trial of Trastuzumab and Docetaxel in Patients With Human Epidermal Growth Factor Receptor 2-Positive Salivary Duct Carcinoma. *J Clin Oncol*. 2019;37(2):125-134.
94. Drilon A, Laetsch TW, Kummar S, et al. Efficacy of Larotrectinib in TRK Fusion-Positive Cancers in Adults and Children. *N Engl J Med*. 2018;378(8):731-739.
95. Drilon A, Li G, Dogan S, et al. What hides behind the MASC: clinical response and acquired resistance to entrectinib after ETV6-NTRK3 identification in a mammary analogue secretory carcinoma (MASC). *Ann Oncol*. 2016;27(5):920-926.

96. Drilon A, Ou SI, Cho BC, et al. Repotrectinib (TPX-0005) Is a Next-Generation ROS1/TRK/ALK Inhibitor That Potently Inhibits ROS1/TRK/ALK Solvent-Front Mutations. *Cancer Discov.* 2018;8(10):1227-1236.
97. Mateo J, Chakravarty D, Dienstmann R, et al. A framework to rank genomic alterations as targets for cancer precision medicine: the ESMO Scale for Clinical Actionability of molecular Targets (ESCAT). *Ann Oncol.* 2018;29(9):1895-1902.
98. Skálová A, Agaimy A, Vanecek T, et al. Molecular Profiling of Clear Cell Myoepithelial Carcinoma of Salivary Glands With EWSR1 Rearrangement Identifies Frequent PLAG1 Gene Fusions But No EWSR1 Fusion Transcripts. *Am J Surg Pathol.* 2021;45(1):1-13.
99. Urano M, Nakaguro M, Yamamoto Y, et al. Diagnostic Significance of HRAS Mutations in Epithelial-Myoepithelial Carcinomas Exhibiting a Broad Histopathologic Spectrum. *Am J Surg Pathol.* 2019;43(7):984-994.
100. De Cecio R, Cantile M, Fulciniti F, et al. Salivary epithelial-myoepithelial carcinoma: clinical, morphological and molecular features. *Pathologica.* 2017;109(1):1-8.
101. Antonescu CR, Katabi N, Zhang L, et al. EWSR1-ATF1 fusion is a novel and consistent finding in hyalinizing clear-cell carcinoma of salivary gland. *Genes Chromosomes Cancer.* 2011;50(7):559-570.
102. Chapman E, Skalova A, Ptakova N, et al. Molecular Profiling of Hyalinizing Clear Cell Carcinomas Revealed a Subset of Tumors Harboring a Novel EWSR1-CREM Fusion: Report of 3 Cases. *Am J Surg Pathol.* 2018;42(9):1182-1189.
103. Major salivary glands. In: Brierley JD, Gospodarowicz MK, Wittekind C, eds. *UICC TNM Classification of Malignant Tumours.* 8th ed. Oxford, UK: Wiley-Blackwell; 2017.
104. Lassche G, van Boxtel W, Ligtenberg MJL, et al. Advances and challenges in precision medicine in salivary gland cancer. *Cancer Treat Rev.* 2019;80:101906.
105. Grisanti S, Amoroso V, Buglione M, et al. Cetuximab in the treatment of metastatic mucoepidermoid carcinoma of the salivary glands: a case report and review of literature. *J Med Case Rep.* 2008;2:320.

106. Han SW, Kim HP, Jeon YK, et al. Mucoepidermoid carcinoma of lung: potential target of EGFR-directed treatment. *Lung Cancer*. 2008;61(1):30-34.
107. Lee KW, Chan AB, Lo AW, et al. Erlotinib in metastatic bronchopulmonary mucoepidermoid carcinoma. *J Thorac Oncol*. 2011;6(12):2140-2141.
108. Li S, Zhang Z, Tang H, et al. Pathological complete response to gefitinib in a 10-year-old boy with EGFR-negative pulmonary mucoepidermoid carcinoma: a case report and literature review. *Clin Respir J*. 2017;11(3):346-351.
109. Milanovic D, Jeremic B, Kayser G, et al. Relapsing high grade mucoepidermoid carcinoma. Long-lasting complete response following reirradiation and EGFR blockade. *Strahlenther Onkol*. 2012;188(6):518-522.
110. Locati LD, Bossi P, Perrone F, et al. Cetuximab in recurrent and/or metastatic salivary gland carcinomas: A phase II study. *Oral Oncol*. 2009;45(7):574-578.
111. Jakob JA, Kies MS, Glisson BS, et al. Phase II study of gefitinib in patients with advanced salivary gland cancers. *Head Neck*. 2015;37(5):644-649.
112. Agulnik M, Cohen EW, Cohen RB, et al. Phase II study of lapatinib in recurrent or metastatic epidermal growth factor receptor and/or erbB2 expressing adenoid cystic carcinoma and non adenoid cystic carcinoma malignant tumors of the salivary glands. *J Clin Oncol*. 2007;25(25):3978-3984.
113. Laurie SA, Ho AL, Fury MG, et al. Systemic therapy in the management of metastatic or locally recurrent adenoid cystic carcinoma of the salivary glands: a systematic review. *Lancet Oncol*. 2011;12(8):815-824.
114. Wong SJ, Karrison T, Hayes DN, et al. Phase II trial of dasatinib for recurrent or metastatic c-KIT expressing adenoid cystic carcinoma and for nonadenoid cystic malignant salivary tumors. *Ann Oncol*. 2016;27(2):318-323.
115. Ferrarotto R, Eckhardt G, Patnaik A, et al. A phase I dose-escalation and dose-expansion study of brontictuzumab in subjects with selected solid tumors. *Ann Oncol*. 2018;29(7):1561-1568.
116. Even C, Lassen U, Merchan J, et al. Safety and clinical activity of the Notch inhibitor, crenigacestat (LY3039478), in an open-label phase I trial expansion cohort of advanced or metastatic adenoid cystic carcinoma. *Invest New Drugs*. 2020;38(2):402-409.
117. Li BT, Shen R, Offin M, et al. Ado-trastuzumab emtansine in patients with HER2 amplified salivary gland cancers (SGCs): Results from a phase II basket trial. *J Clin Oncol*. 2019;37(suppl\_15):6001.

118. Hanna GJ, Guenette JP, Chau NG, et al. Tipifarnib in recurrent, metastatic HRAS-mutant salivary gland cancer. *Cancer*. 2020;126(17):3972-3981.
119. Alfieri S, Granata R, Bergamini C, et al. Systemic therapy in metastatic salivary gland carcinomas: A pathology-driven paradigm? *Oral Oncol*. 2017;66:58-63.
120. Schmitt NC, Kang H, Sharma A. Salivary duct carcinoma: An aggressive salivary gland malignancy with opportunities for targeted therapy. *Oral Oncol*. 2017;74:40-48.
121. Ho AL, Dunn L, Sherman EJ, et al. A phase II study of axitinib (AG-013736) in patients with incurable adenoid cystic carcinoma. *Ann Oncol*. 2016;27(10):1902-1908.
122. Locati LD, Cavalieri S, Bergamini C, et al. Phase II trial with axitinib in recurrent and/or metastatic salivary gland cancers of the upper aerodigestive tract. *Head Neck*. 2019;41(10):3670-3676.
123. Kang EJ, Ahn MJ, Ock CY, et al. Randomized Phase II Study of Axitinib versus Observation in Patients with Recurred or Metastatic Adenoid Cystic Carcinoma. *Clin Cancer Res*. 2021;27(19):5272-5279.
124. Tchekmedyian V, Sherman EJ, Dunn L, et al. Phase II Study of Lenvatinib in Patients With Progressive, Recurrent or Metastatic Adenoid Cystic Carcinoma. *J Clin Oncol*. 2019;37(18):1529-1537.
125. Locati LD, Galbiati D, Calareso G, et al. Patients with adenoid cystic carcinomas of the salivary glands treated with lenvatinib: Activity and quality of life. *Cancer*. 2020;126(9):1888-1894.
126. Thomson DJ, Silva P, Denton K, et al. Phase II trial of sorafenib in advanced salivary adenoid cystic carcinoma of the head and neck. *Head Neck*. 2015;37(2):182-187.
127. Locati LD, Perrone F, Cortelazzi B, et al. A phase II study of sorafenib in recurrent and/or metastatic salivary gland carcinomas: Translational analyses and clinical impact. *Eur J Cancer*. 2016;69:158-165.
128. Chau NG, Hotte SJ, Chen EX, et al. A phase II study of sunitinib in recurrent and/or metastatic adenoid cystic carcinoma (ACC) of the salivary glands: current progress and challenges in evaluating molecularly targeted agents in ACC. *Ann Oncol*. 2012;23(6):1562-1570.

129. Doebele RC, Drilon A, Paz-Ares L, et al. Entrectinib in patients with advanced or metastatic NTRK fusion-positive solid tumours: integrated analysis of three phase 1-2 trials. *Lancet Oncol.* 2020;21(2):271-282.
130. Hong DS, DuBois SG, Kummar S, et al. Larotrectinib in patients with TRK fusion-positive solid tumours: a pooled analysis of three phase 1/2 clinical trials. *Lancet Oncol.* 2020;21(4):531-540.
131. Cherny NI, Dafni U, Bogaerts J, et al. ESMO-Magnitude of Clinical Benefit Scale version 1.1. *Ann Oncol.* 2017;28(10):2340-2366.
132. Dykewicz CA. Summary of the guidelines for preventing opportunistic infections among hematopoietic stem cell transplant recipients. *Clin Infect Dis.* 2001;33(2):139-144.
133. Gross PA, Barrett TL, Dellinger EP, et al. Purpose of quality standards for infectious diseases. Infectious Diseases Society of America. *Clin Infect Dis.* 1994;18(3):421.
